# Supplementary material
Source: PubMed Central journal article supplement (PMC7197024)
Supplement: NIHMS1021200-supplement-Appendix_A.pdf [file NIHMS1021200-supplement-Appendix_A.pdf]

## Appendix A.

### Search Strategies

PubMed search string:

Search ((HIV Infections[MeSH] OR HIV[MeSH] OR hiv OR hiv-1\* OR hiv-2\* OR hiv1 OR hiv2 OR hiv infect\* OR human immunodeficiency virus OR human immunodeficiency virus OR human immuno-deficiency virus OR human immune-deficiency virus OR ((human immun\*) AND (deficiency virus)) OR acquired immunodeficiency syndrome OR acquired immunodeficiency syndrome OR acquired immuno-deficiency syndrome OR acquired immune-deficiency syndrome OR ((acquired immun\*) AND (deficiency syndrome)) OR "sexually transmitted diseases, Viral"[MeSH:NoExp])) AND ("Adolescent"[MeSH] OR youth OR youths OR youngster OR teenager OR teenagers OR teen OR teens OR adolescent[mh] OR adolescent OR adolescents OR adolescence OR child[mh] OR child OR children OR young person\* OR young people OR student OR students) AND ("Domestic Violence"[MeSH] OR intimate partner violence OR intimate partner abuse OR dating violence OR dating abuse OR relationship violence OR relationship abuse OR physical abuse[mh] OR adolescent relationship abuse OR adolescent dating abuse OR adolescent dating violence OR violence against women OR sexual assault OR sexual violence OR sexual abuse OR young people "Intimate Partner Violence"[Mesh]) AND (Africa OR Sub-Saharan OR Angola OR Benin OR Botswana OR Burkina Faso OR Burundi OR Cameroon OR "Cape Verde" OR "Central African Republic" OR Chad OR Comoros OR Congo OR Cote d'Ivoire OR Djibouti OR "Equatorial Guinea" OR Eritrea OR Ethiopia OR Gabon OR Gambia OR Ghana OR Guinea OR Guinea-Bissau OR Kenya OR Lesotho OR Liberia OR Madagascar OR Malawi OR Mali OR Mauritania OR Mauritius OR Mozambique OR Namibia OR Niger OR Nigeria OR Rwanda OR "Sao Tome and

**\*Previous affiliation with the Brown University School of Public Health at the time research was conducted**

Principe” OR Senegal OR Seychelles OR Sierra Leone OR Somalia OR “South Africa” OR Sudan OR Swaziland OR Tanzania OR Togo OR Uganda OR “Western Sahara” OR Zambia OR Zimbabwe)

Embase search string:

((('human immunodeficiency virus infection'/exp OR 'human immunodeficiency virus infection') AND ([embase]/lim OR [medline]/lim)) OR ('human immunodeficiency virus'/exp OR 'human immunodeficiency virus') OR ('human immunodeficiency virus 1'/exp OR 'human immunodeficiency virus 1') OR ('acquired immune deficiency syndrome'/exp OR 'acquired immune deficiency syndrome') OR ('serodiagnosis')) AND (('partner violence') OR ('domestic violence') OR ('dating violence') OR ('sexual assault') OR ('sexual violence') OR ('rape') OR ('sexual abuse')) AND (('juvenile') OR ('adolescent') OR ('child') OR ('adolescence') OR ('student') OR ('school age') OR ('young adult')) AND (('africa') OR ('africa south of the sahara') OR ('angola') OR ('angolan') OR ('benin') OR ('beninese') OR ('botswana') OR ('burkina faso') OR ('burkinabe') OR ('burundi') OR ('cameroon') OR ('cameroonian') OR ('cape verde') OR ('central africa') OR ('central african republic') OR ('central african') OR ('chad') OR ('comoros') OR ('congo') OR ('cote divoire') OR ('djibouti') OR ('equatorial guinea') OR ('eritrea') OR ('eritrean') OR ('ethiopia') OR ('ethiopian') OR ('gabon') OR ('gabonese') OR ('ghana') OR ('ghanaian') OR ('guinea') OR ('guinea-bissau') OR ('kenya') OR ('kenyan') OR ('lesotho') OR ('liberia') OR ('liberian') OR ('madagascar') OR ('malawi') OR ('malawian') OR ('mali') OR ('mauritania') OR ('mauritus') OR ('mozambique') OR ('mozambican') OR ('namibia') OR ('namibian') OR ('niger') OR ('nigeria') OR ('nigerian') OR ('rwanda') OR ('rwandan') OR ('sao tome and principe') OR ('senegal') OR ('senegalese') OR ('seychelles') OR ('seychellene') OR ('sierra leone') OR ('sierra leonean') OR ('somalia') OR ('somali (citizen)'))

OR ('south africa') OR ('south african') OR ('sudan') OR ('sudanese') OR ('swaziland') OR ('swazi (people)') OR ('tanzania') OR ('tanzanian') OR ('togo') OR ('togolese') OR ('uganda') OR ('ugandan') OR ('western sahara') OR ('zambia') OR ('zambian') OR ('zimbabwe') OR ('zimbabwean'))

PsychInfo search string:

Search Alert: "( (HIV Infections OR HIV OR hiv OR hiv-1\* OR hiv-2\* OR hiv1 OR hiv2 OR hiv infect\* OR human immunodeficiency virus OR human immunodeficiency virus OR human immuno-deficiency virus OR human immune-deficiency virus OR ((human immun\*) AND (deficiency virus)) OR acquired immunodeficiency syndrome OR acquired immunodeficiency syndrome OR acquired immuno-deficiency syndrome OR acquired immune-deficiency syndrome OR ((acquired immun\*) AND (deficiency syndrome)) OR "sexually transmitted diseases, Viral" ) AND ( ("Adolescent" OR youth OR youths OR youngster OR teenager OR teenagers OR teen OR teens OR adolescent[mh] OR adolescent OR adolescents OR adolescence OR child[mh] OR child OR children OR young adult OR young person\* OR young people OR student OR students) ) AND ( "Domestic Violence" OR intimate partner violence OR intimate partner abuse OR dating violence OR dating abuse OR relationship violence OR relationship abuse OR physical abuse OR adolescent relationship abuse OR adolescent dating abuse OR adolescent dating violence OR violence against women OR sexual assault OR sexual violence OR sexual abuse OR young people "Intimate Partner Violence" ) AND ( (Africa OR Sub-Saharan OR Angola OR Benin OR Botswana OR Burkina Faso OR Burundi OR Cameroon OR "Cape Verde" OR "Central African Republic" OR Chad OR Comoros OR Congo OR Cote d'Ivoire OR Djibouti OR "Equatorial Guinea" OR Eritrea OR Ethiopia OR Gabon OR Gambia OR Ghana OR Guinea OR Guinea-Bissau OR Kenya OR Lesotho OR Liberia OR Madagascar

OR Malawi OR Mali OR Mauritania OR Mauritius OR Mozambique OR Namibia OR Niger OR Nigeria OR Rwanda OR “Sao Tome and Principe” OR Senegal OR Seychelles OR Sierra Leone OR Somalia OR “South Africa” OR Sudan OR Swaziland OR Tanzania OR Togo OR Uganda OR “Western Sahara” OR Zambia OR Zimbabwe )

CINAHL search string:

Search Alert: "( (HIV Infections OR HIV OR hiv OR hiv-1\* OR hiv-2\* OR hiv1 OR hiv2 OR hiv infect\* OR human immunodeficiency virus OR human immunodeficiency virus OR human immuno-deficiency virus OR human immune-deficiency virus OR ((human immun\*) AND (deficiency virus)) OR acquired immunodeficiency syndrome OR acquired immunodeficiency syndrome OR acquired immuno-deficiency syndrome OR acquired immune-deficiency syndrome OR ((acquired immun\*) AND (deficiency syndrome)) OR "sexually transmitted diseases, Viral" ) ) AND ( ( “Adolescent” OR youth OR youths OR youngster OR teenager OR teenagers OR teen OR teens OR adolescent[mh] OR adolescent OR adolescents OR adolescence OR child[mh] OR child OR children OR young adult OR young person\* OR young people OR student OR students ) ) AND ( ( “Domestic Violence” OR intimate partner violence OR intimate partner abuse OR dating violence OR dating abuse OR relationship violence OR relationship abuse OR physical abuse OR adolescent relationship abuse OR adolescent dating abuse OR adolescent dating violence OR violence against women OR sexual assault OR sexual violence OR sexual abuse OR young people "Intimate Partner Violence" ) ) AND ( ( Africa OR Sub-Saharan OR Angola OR Benin OR Botswana OR Burkina Faso OR Burundi OR Cameroon OR “Cape Verde” OR “Central African Republic” OR Chad OR Comoros OR Congo OR Cote d’Ivoire OR Djibouti OR “Equatorial Guinea” OR Eritrea OR Ethiopia OR Gabon OR Gambia OR Ghana OR Guinea OR Guinea-Bissau OR Kenya OR Lesotho OR Liberia OR Madagascar

OR Malawi OR Mali OR Mauritania OR Mauritius OR Mozambique OR Namibia OR Niger OR  
Nigeria OR Rwanda OR “Sao Tome and Principe” OR Senegal OR Seychelles OR Sierra Leone  
OR Somalia OR “South Africa” OR Sudan OR Swaziland OR Tanzania OR Togo OR Uganda  
OR “Western Sahara” OR Zambia OR Zimbabwe)
